# Supplementary material for: Synthesis of rigidified flavin–guanidinium ion conjugates and investigation of their photocatalytic properties
Source: publisher site journal article supplement (doi:10.3762/bjoc.5.26), 2009-05-28

# Synthesis of rigidified flavin–guanidinium ion conjugates and investigation of their photocatalytic properties

Harald Schmaderer, Mouchumi Bhuyan and Burkhard König\*

Address: Institute of Organic Chemistry, University of Regensburg, Universitätsstr. 31,  
D-93040 Regensburg, Germany

Email: Burkhard König - burkhard.koenig@chemie.uni-regensburg.de

\* Corresponding author

## Supporting Information

|                                                                      |    |
|----------------------------------------------------------------------|----|
| Detailed experimental setups for the photocatalytic experiments      | 2  |
| Calculated gas phase conformations of compound <b>1</b>              | 3  |
| UV/Vis and fluorescence spectra of <b>1</b> , <b>2</b> and <b>3</b>  | 4  |
| UV- and emission titration of compound <b>2</b> and phosphate esters | 5  |
| <sup>1</sup> H and <sup>13</sup> C NMR spectra of <b>6</b>           | 8  |
| <sup>1</sup> H and <sup>13</sup> C NMR spectra of <b>9</b>           | 9  |
| <sup>1</sup> H and <sup>13</sup> C NMR spectra of <b>7</b>           | 10 |
| <sup>1</sup> H and <sup>13</sup> C NMR spectra of <b>10</b>          | 11 |
| <sup>1</sup> H and <sup>13</sup> C NMR spectra of <b>1</b>           | 12 |
| <sup>1</sup> H and <sup>13</sup> C NMR spectra of <b>2</b>           | 13 |

## Detailed experimental setups for the photocatalytic experiments

### Oxidative photocleavage of dibenzyl phosphate

The photocleavage of dibenzyl phosphate was tested in small glass vials with deuterated solvents (1 mL, MeCN- $d_3$  or D<sub>2</sub>O), containing the phosphate starting material ( $10 \times 10^{-3}$  M) and flavin catalyst ( $2 \times 10^{-3}$  M, 20 mol%). The mixture was stirred and irradiated by a LED (440 nm, 5 W) at 40 °C for 2 h (D<sub>2</sub>O) or 4 h (MeCN- $d_3$ ), respectively. The products were identified by <sup>1</sup>H NMR and mass spectrometry and the conversion was determined by integration of the aromatic protons in the <sup>1</sup>H NMR.

### Photoreduction of 4-nitrophenyl phosphate

The photocleavage of dibenzyl phosphate was tested in small glass vials in MeCN or water (5 mL), containing the 4-nitrophenyl phosphate starting material ( $10 \times 10^{-3}$  M), triethanol amine as sacrificial electron donor ( $100 \times 10^{-3}$  M, 10 equivalents), and flavin catalyst ( $1 \times 10^{-3}$  M, 10 mol%). The solution was degassed by three consecutive pump and freeze cycles and afterwards, the solution was stirred and irradiated by a LED (440 nm, 5 W) and a UV-lamp (370 nm) at 40 °C for 4 h. Reaction mixtures in MeCN were evaporated and dried. The mixtures of the experiments in water were lyophilized. 4-aminophenyl phosphate and 4-amino phenol as by-product were identified by <sup>1</sup>H NMR and mass spectrometry, respectively. The conversion was determined by integration of the aromatic protons in the <sup>1</sup>H NMR.

### Photo Diels–Alder-reaction of anthracene with N-methyl-maleinimide

Photoinduced Diels–Alder-reactions were carried out in small glass vials in dry toluene (1.2 mL), containing anthracene ( $33 \times 10^{-3}$  M), methyl maleinimide ( $83 \times 10^{-3}$  M, 2.5 equivalents), and flavin catalyst ( $0.67 \times 10^{-3}$  M, 2 mol%). The mixture was stirred and irradiated by a LED (440 nm, 5 W) at 40 °C for 8 h. Afterwards, the solvent was evaporated and the mixture was dried. The products were identified by <sup>1</sup>H NMR and mass spectrometry and the conversion was determined by integration of the aromatic protons in the <sup>1</sup>H NMR.

## Calculated gas phase conformations

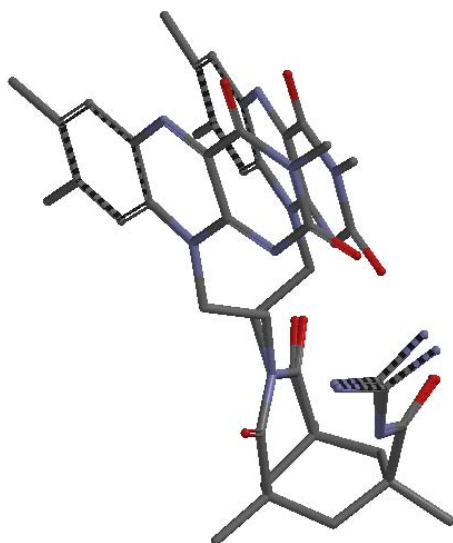

**Figure S.1:** Calculated conformations of **1** in the gas phase (AM1, Spartan program package).

Figure S.1 shows the two lowest energy conformations of compound **1** in the gas phase (semi-empirical AM1, Spartan program package, difference: 13.5 kJ/mol). It is possible to transform the structures into each other by rotation of the C–C single bonds of the ethane linker that are expected to rotate freely in solution.

## UV/Vis and fluorescence spectra of compounds 1, 2 and 3

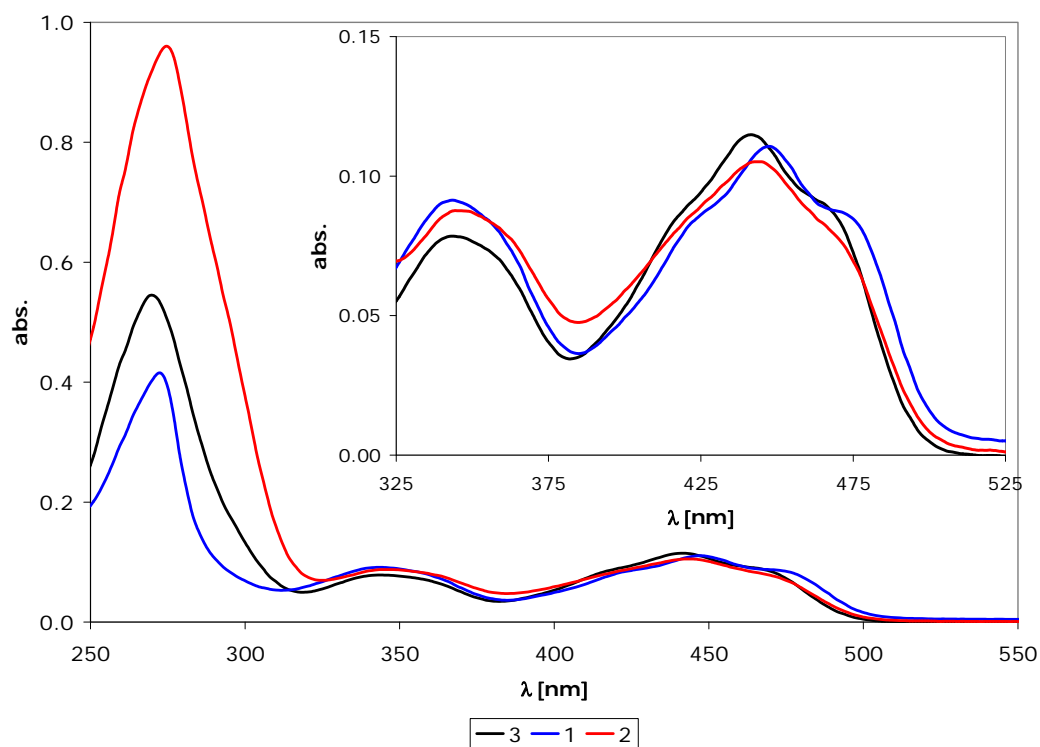

**Figure S.2:** Absorption spectra of 1, 2 and 3 (MeCN + 1% DMSO,  $1 \times 10^{-5}$  M)

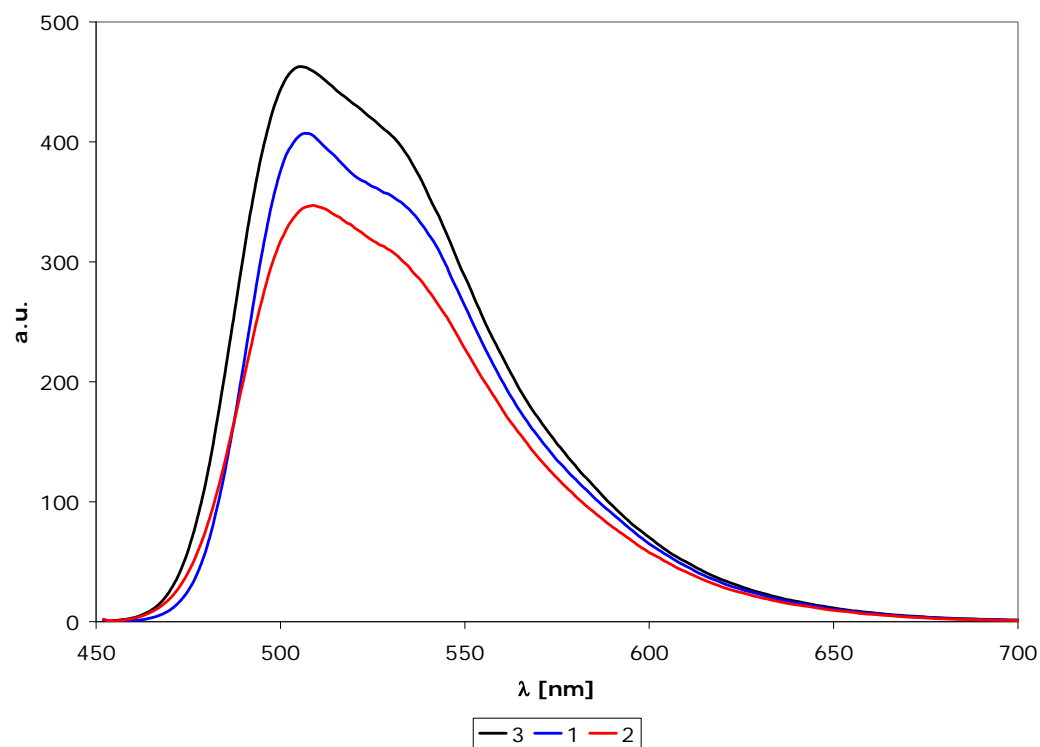

**Figure S.3:** Fluorescence spectra of 1, 2 and 3 [MeCN + 1% DMSO,  $1 \times 10^{-5}$  M, excitation at 445 nm (1+2) and 440 nm (3)]

## UV- and emission titration of compound **2** and phosphate esters

UV-visible and emission titrations were recorded for compound **2** with sodium phenyl phosphate (dibasic dihydrate) and bis-(4-nitrophenyl) phosphate. UV-visible absorption spectroscopy was performed using a Cary 50 Bio spectrophotometer and fluorescence spectroscopy was performed using a Varian Cary Eclipse fluorescence spectrophotometer. The titration experiments with the phosphate anion species were carried out using a solution (2.5 mL) of compound **2** (50  $\mu$ M in HEPES Buffer; pH 7.4 and 50  $\mu$ M in  $\text{CH}_3\text{CN}$ ) in a quartz cell at 25  $^\circ\text{C}$ . The absorption and emission spectral changes were monitored upon addition of a freshly prepared solution of the analytes (in HEPES Buffer and in  $\text{CH}_3\text{CN}$ ) with a microsyringe.

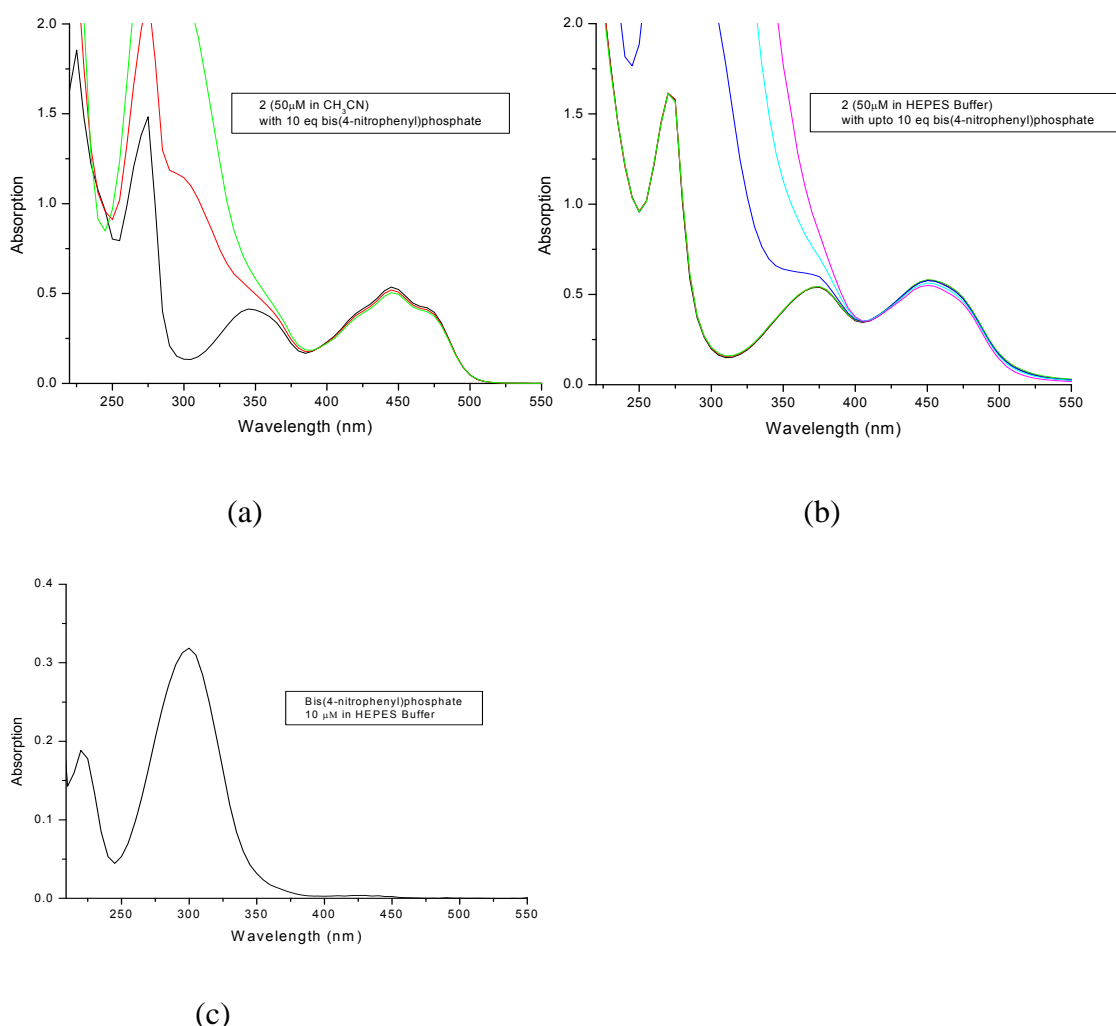

**Figure S.4:** UV-Visible spectra of compound **2** (a) with bis (4-nitrophenyl) phosphate in  $\text{CH}_3\text{CN}$ , (b) with bis (4-nitrophenyl) phosphate in HEPES Buffer (c) UV-Visible of bis (4-nitrophenyl) phosphate in HEPES Buffer.

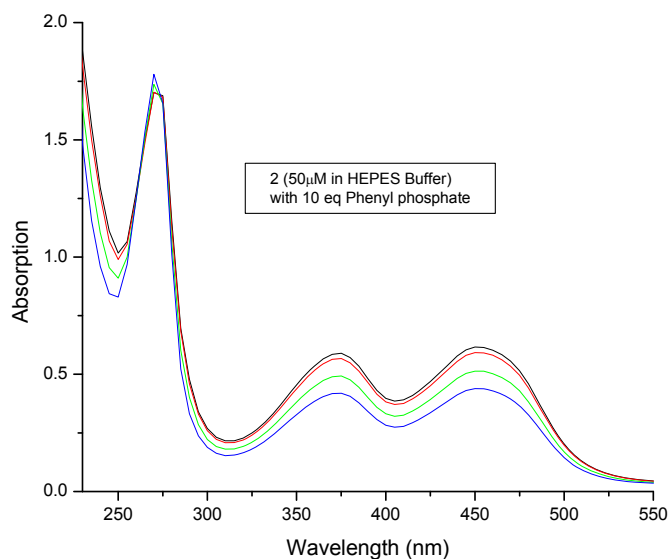

**Figure S.5:** UV-Visible spectra of compound **2** and sodium phenyl phosphate (dibasic dihydrate) in HEPES Buffer.

The fluorescence spectroscopic studies of compound **2** are shown below. In the presence of bis-(4-nitrophenyl) phosphate as analyte in acetonitrile the emission intensity decreases, while the change is not prominent in HEPES Buffer solution.

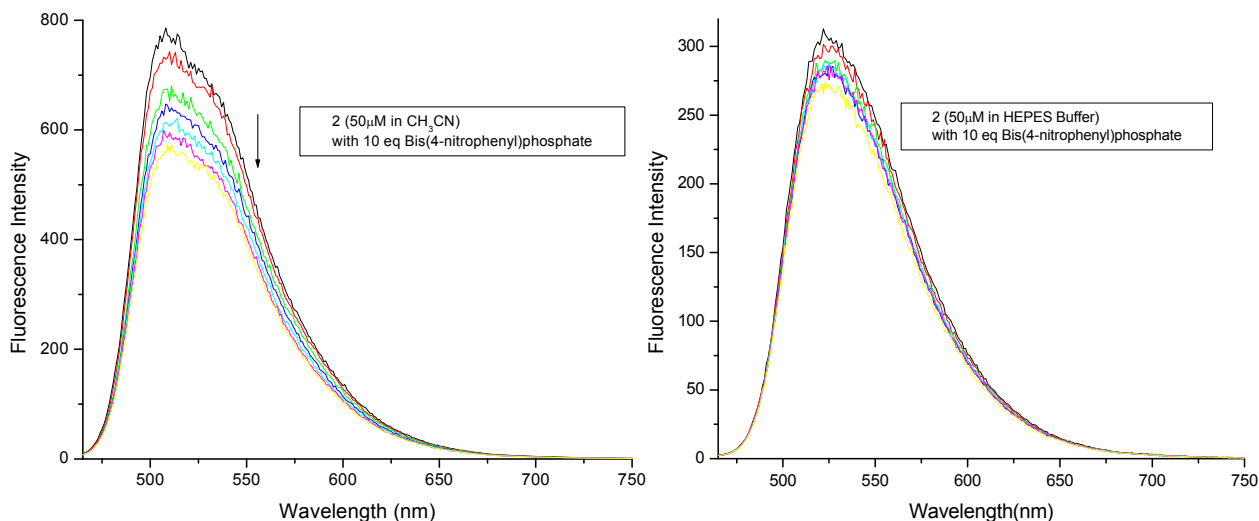

**Figure S.6:** Fluorescence intensity change of compound **2** with bis (4-nitrophenyl) phosphate in CH<sub>3</sub>CN and in HEPES Buffer.  $\lambda_{\text{ex}}$  = 445 nm, PMT detector voltage is medium, slit width = 5.

With sodium phenyl phosphate (dibasic dihydrate) as the analyte, compound **2** did not show any significant change in its emission intensity.

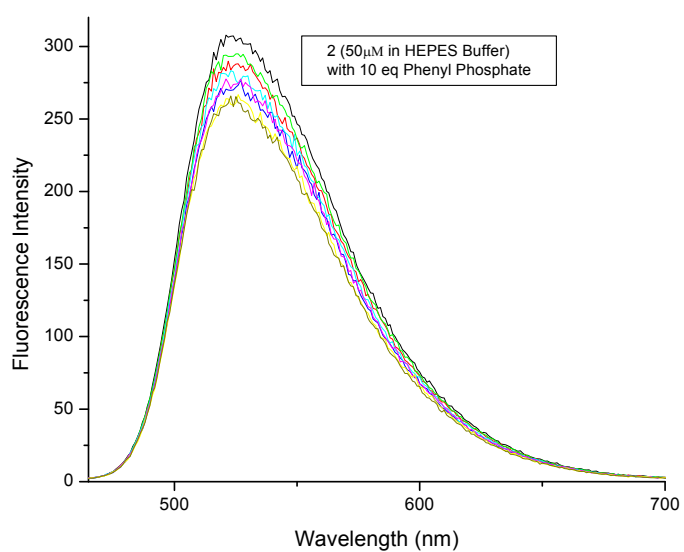

**Figure S.7:** Fluorescence intensity change of compound **2** with sodium phenyl phosphate (dibasic dihydrate) in HEPES Buffer.  $\lambda_{\text{ex}} = 445$  nm, PMT detector voltage is medium, slit width = 5.

$^1\text{H}$  NMR spectrum (300 MHz,  $\text{DMSO-}d_6$ ) (top) and  $^{13}\text{C}$  NMR (75 MHz,  $\text{DMSO-}d_6$ ) of compound **6**.

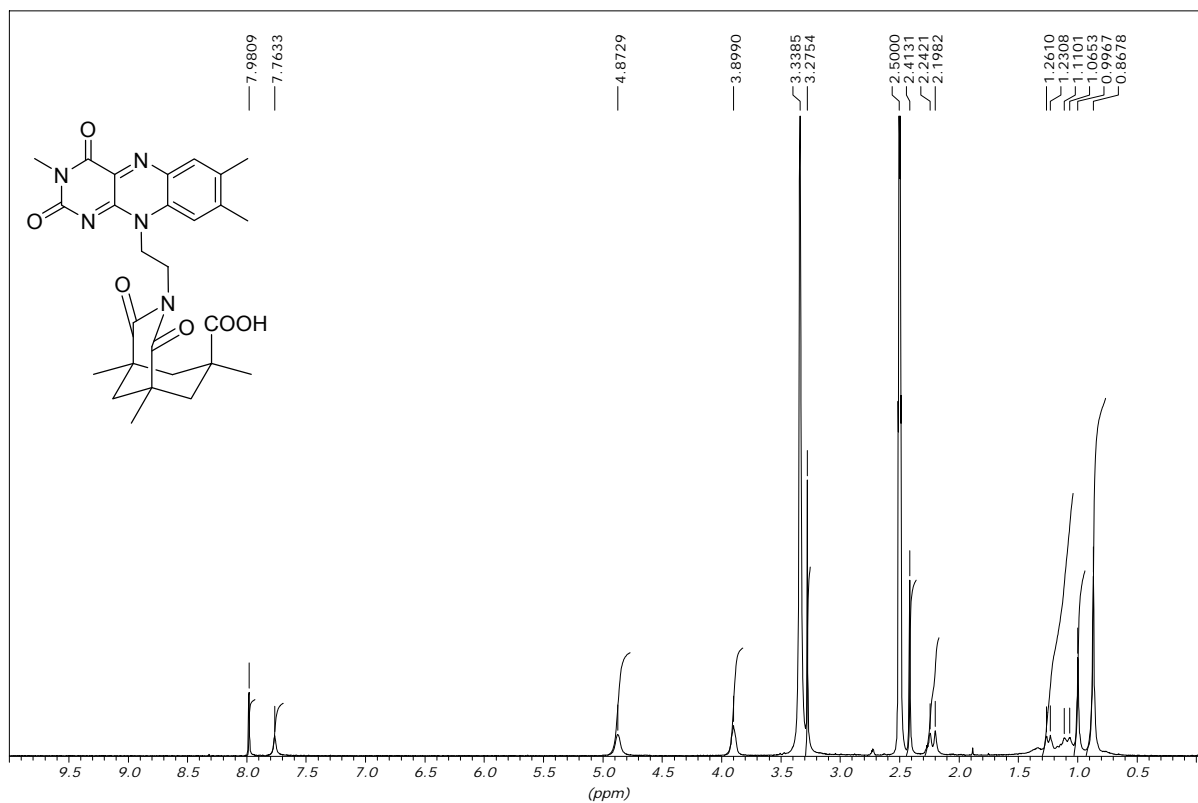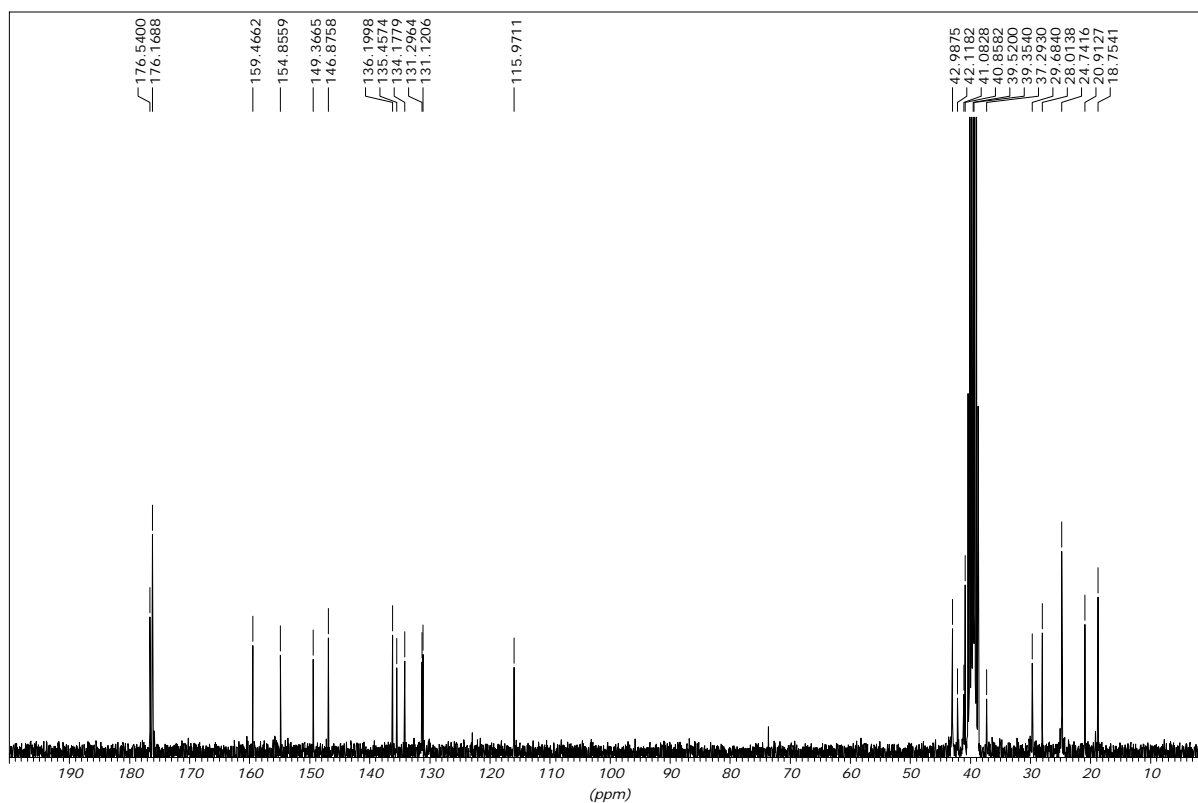



$^1\text{H}$  NMR spectrum (300 MHz,  $\text{DMSO}-d_6$ ) (top) and  $^{13}\text{C}$  NMR (75 MHz,  $\text{DMSO}-d_6$ ) of compound **9**.

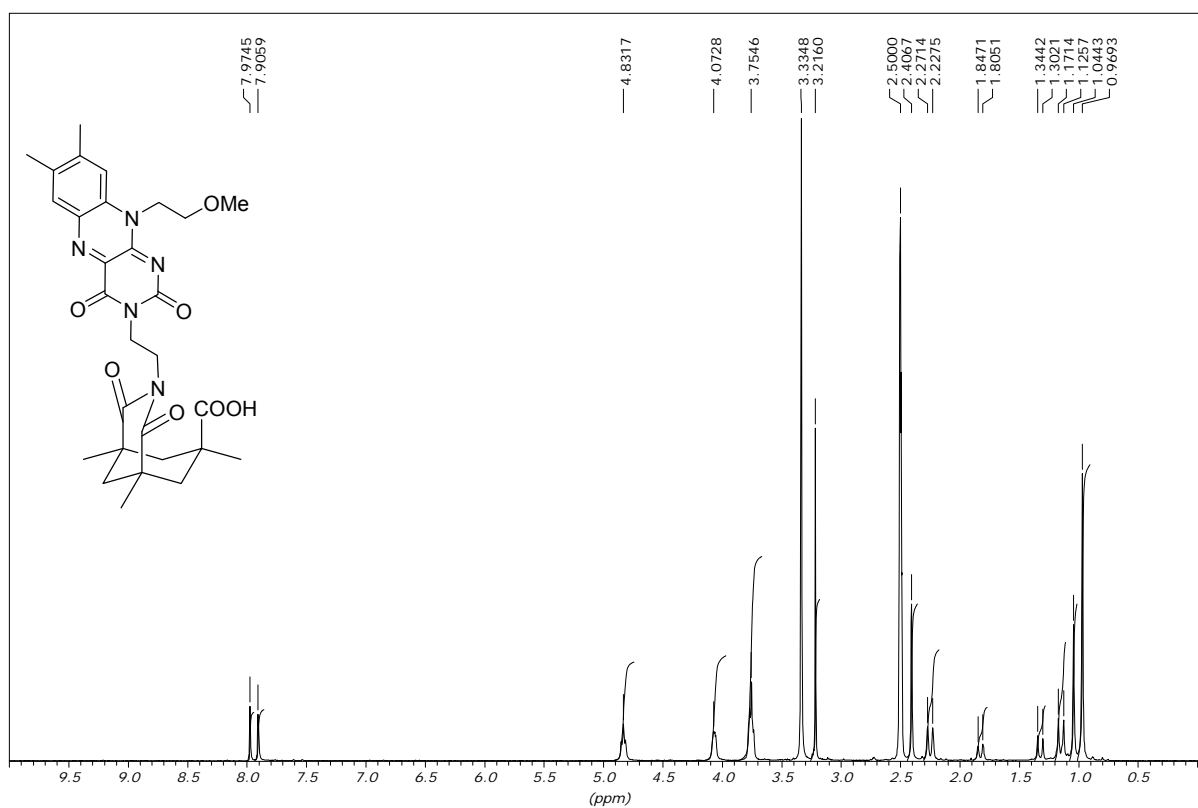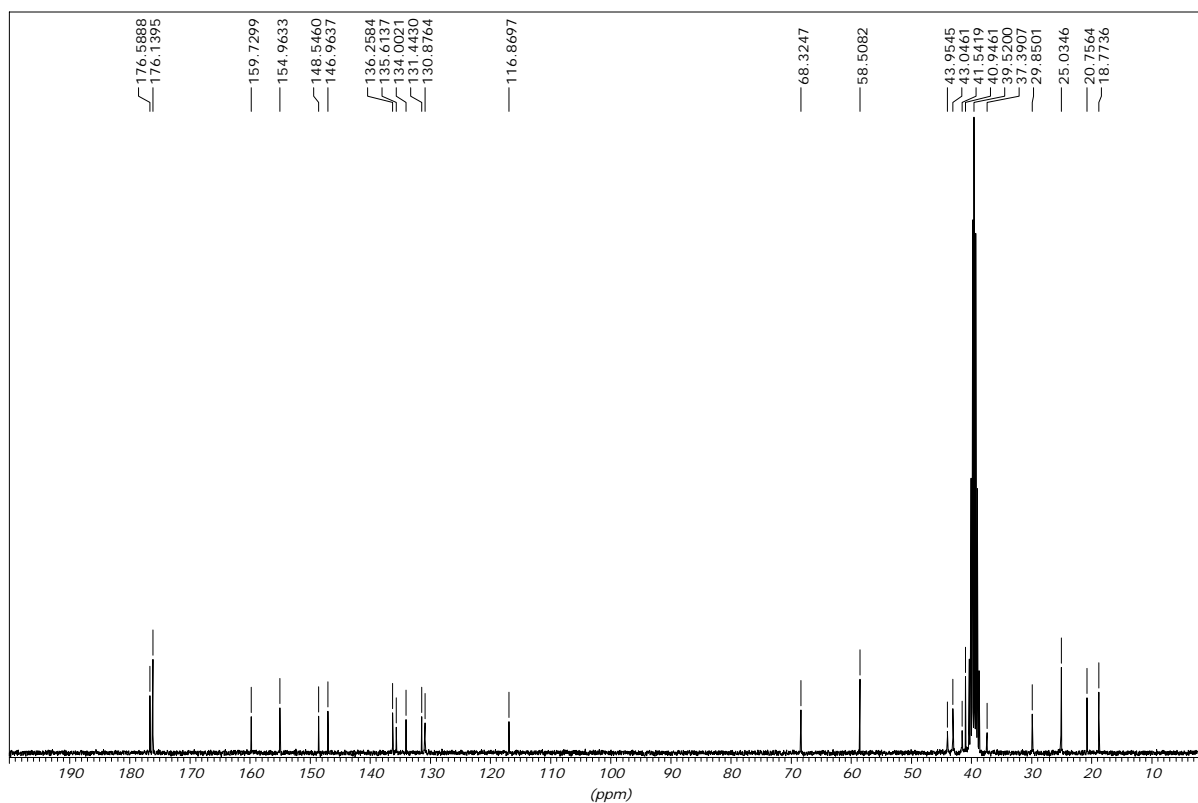

$^1\text{H}$  NMR spectrum (300 MHz,  $\text{CDCl}_3$ ) (top) and  $^{13}\text{C}$  NMR (75 MHz,  $\text{CDCl}_3$ ) of compound **7**.

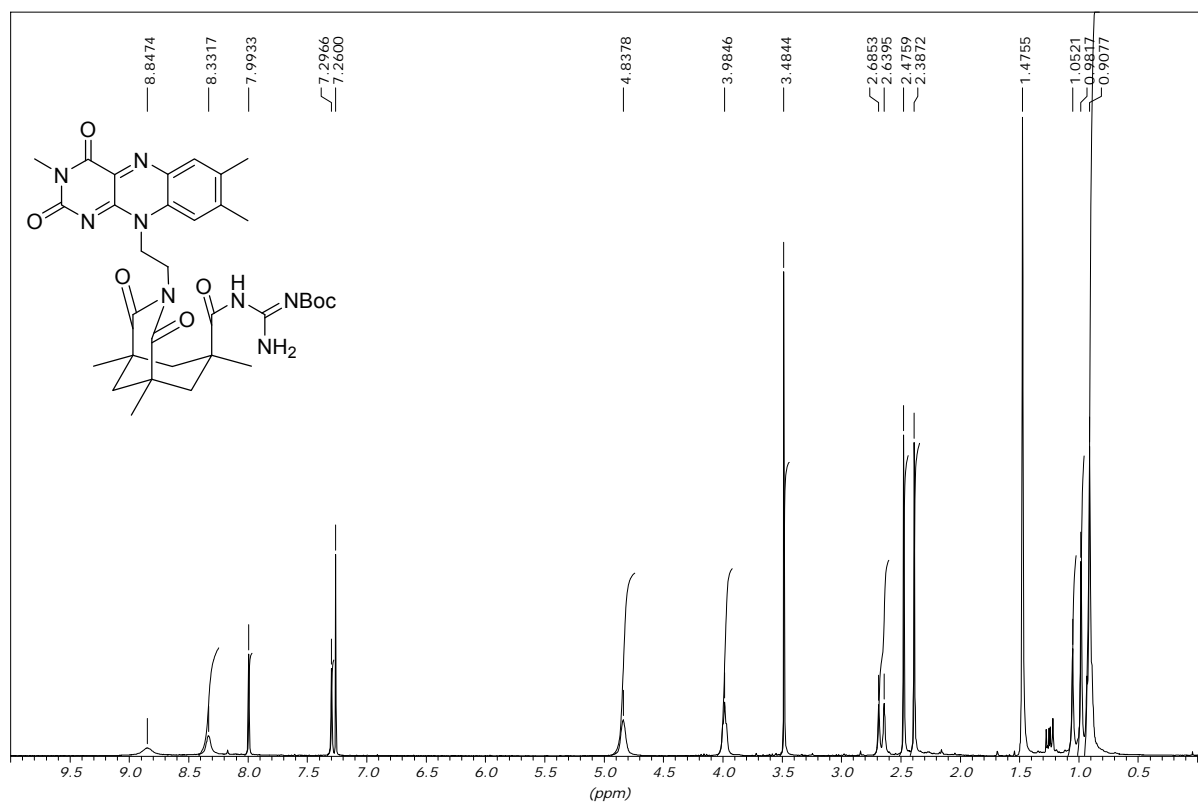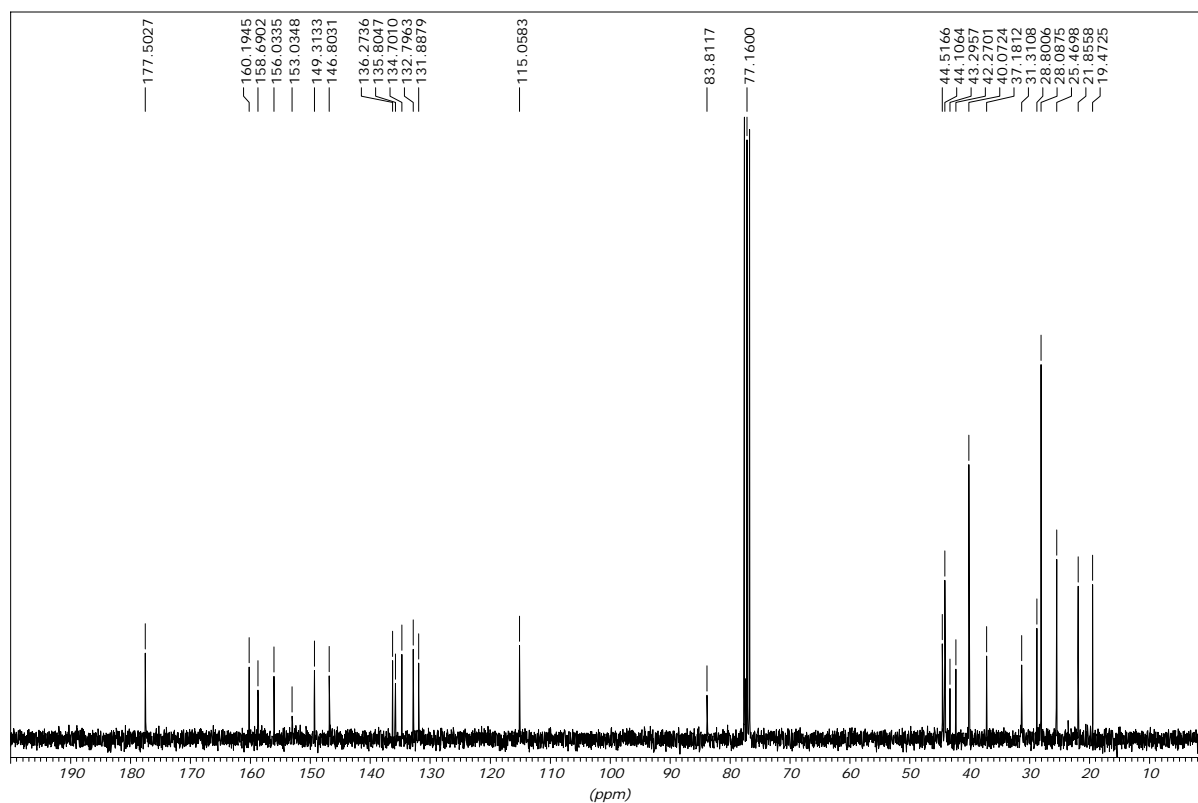

$^1\text{H}$  NMR spectrum (300 MHz,  $\text{CDCl}_3$ ) (top) and  $^{13}\text{C}$  NMR (75 MHz,  $\text{CDCl}_3$ ) of compound **10**.

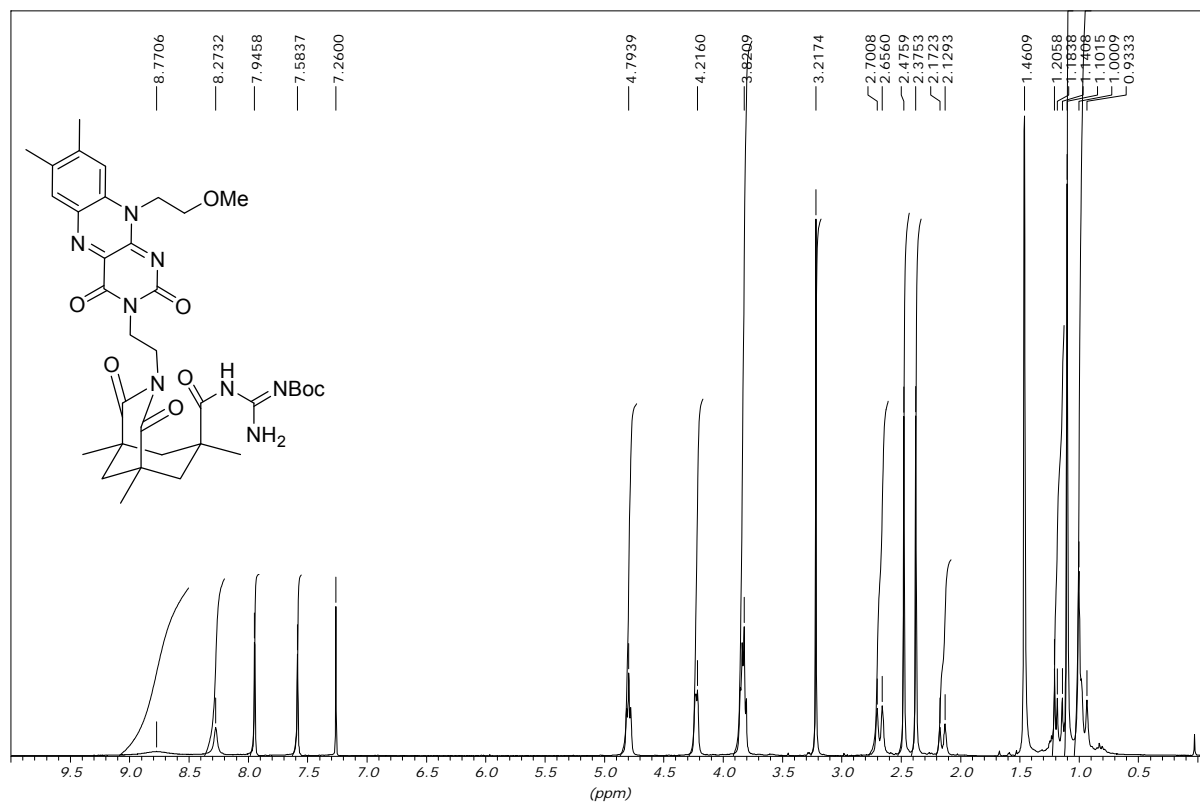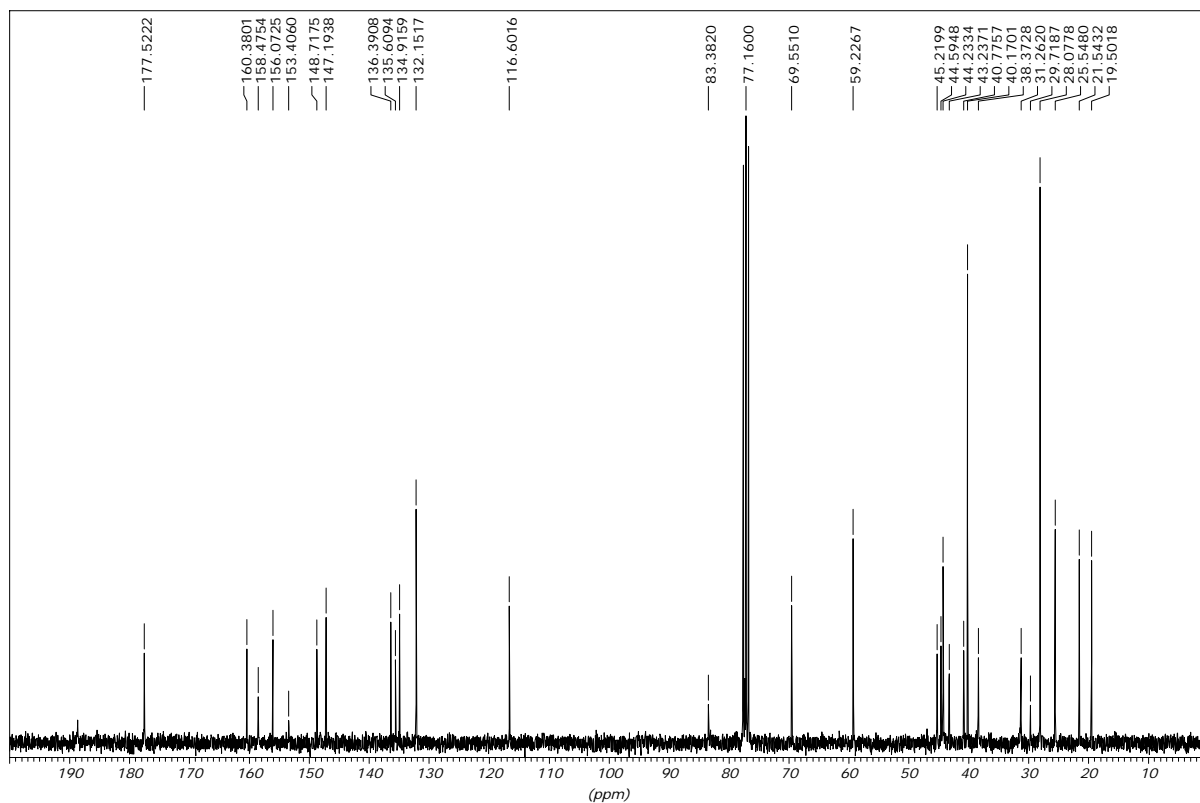

$^1\text{H}$  NMR spectrum (600 MHz,  $\text{DMSO}-d_6$ ) (top) and  $^{13}\text{C}$  NMR (150 MHz,  $\text{DMSO}-d_6$ ) of compound **1**.

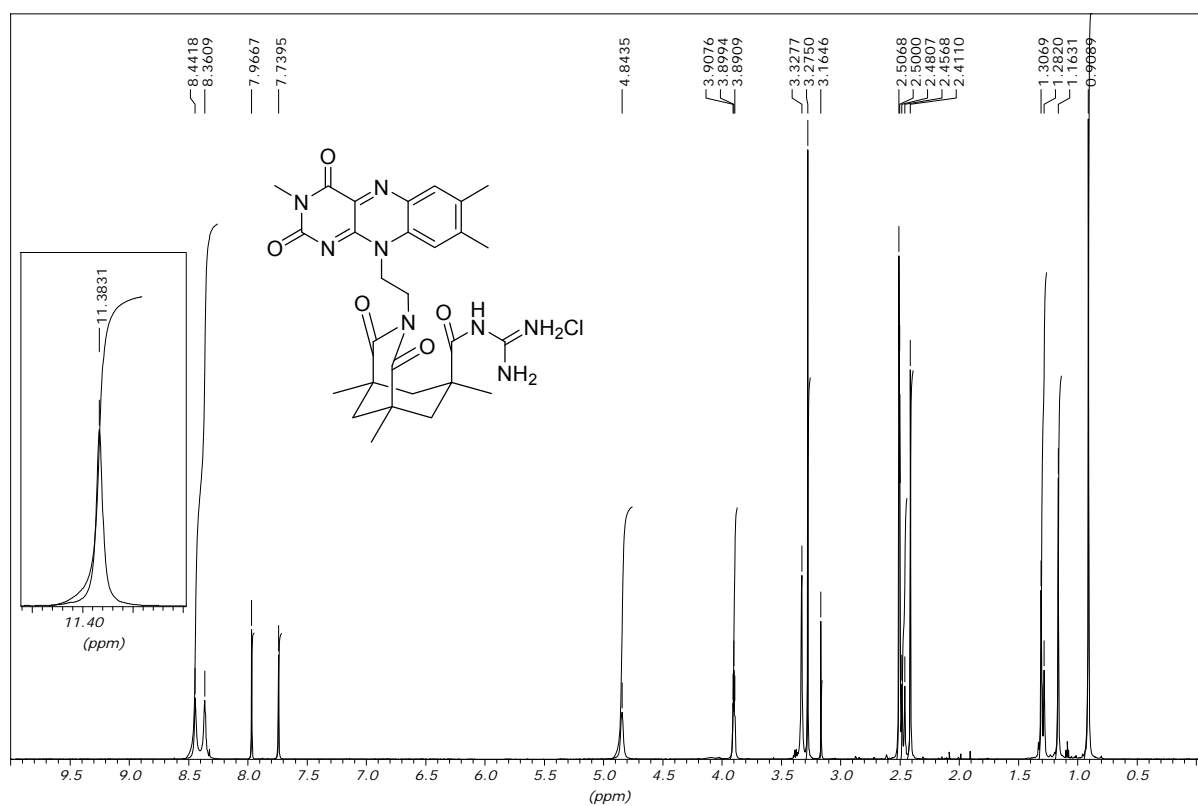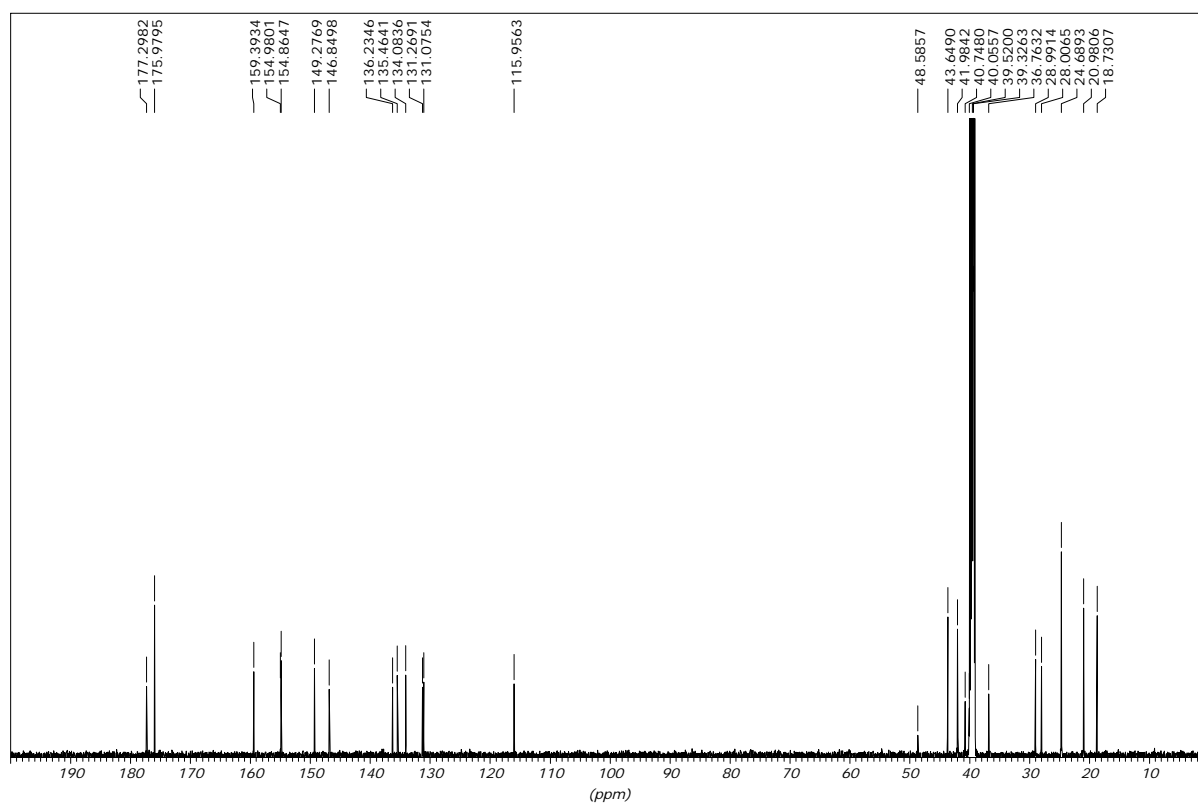

$^1\text{H}$  NMR spectrum (600 MHz,  $\text{DMSO}-d_6$ ) (top) and  $^{13}\text{C}$  NMR (150 MHz,  $\text{DMSO}-d_6$ ) of compound **2**.

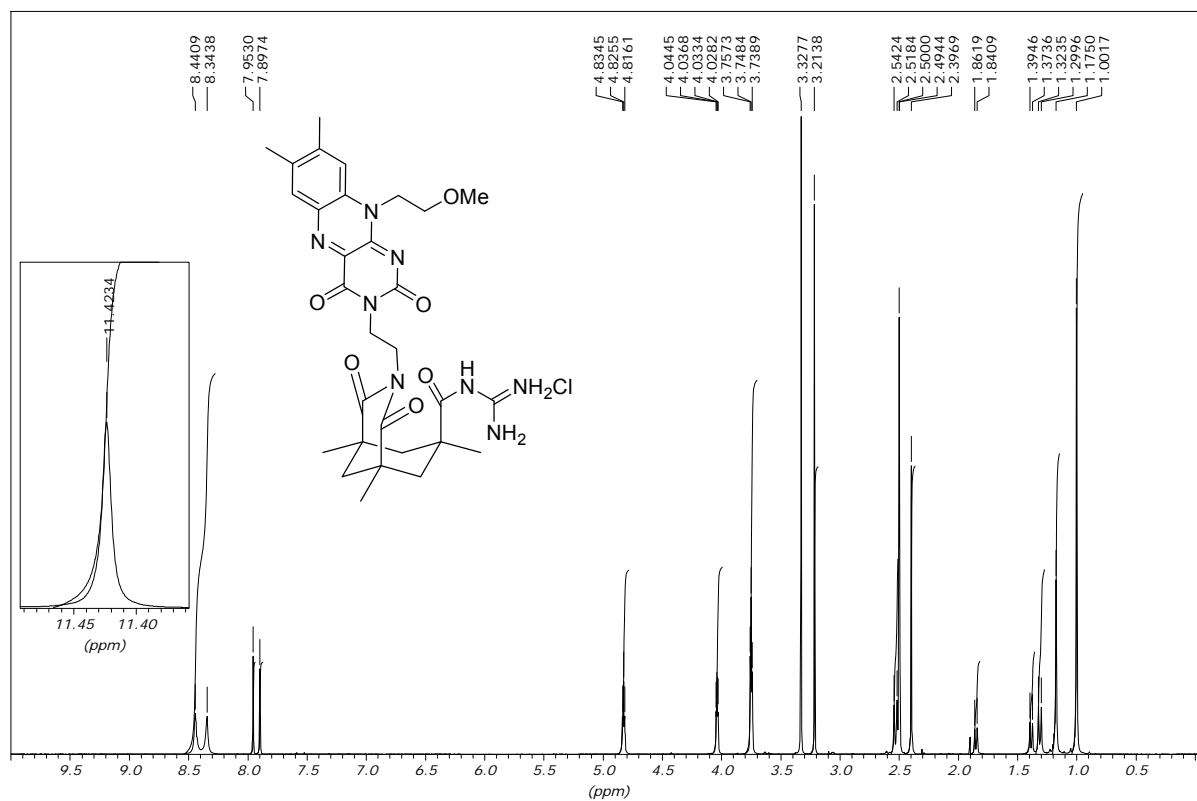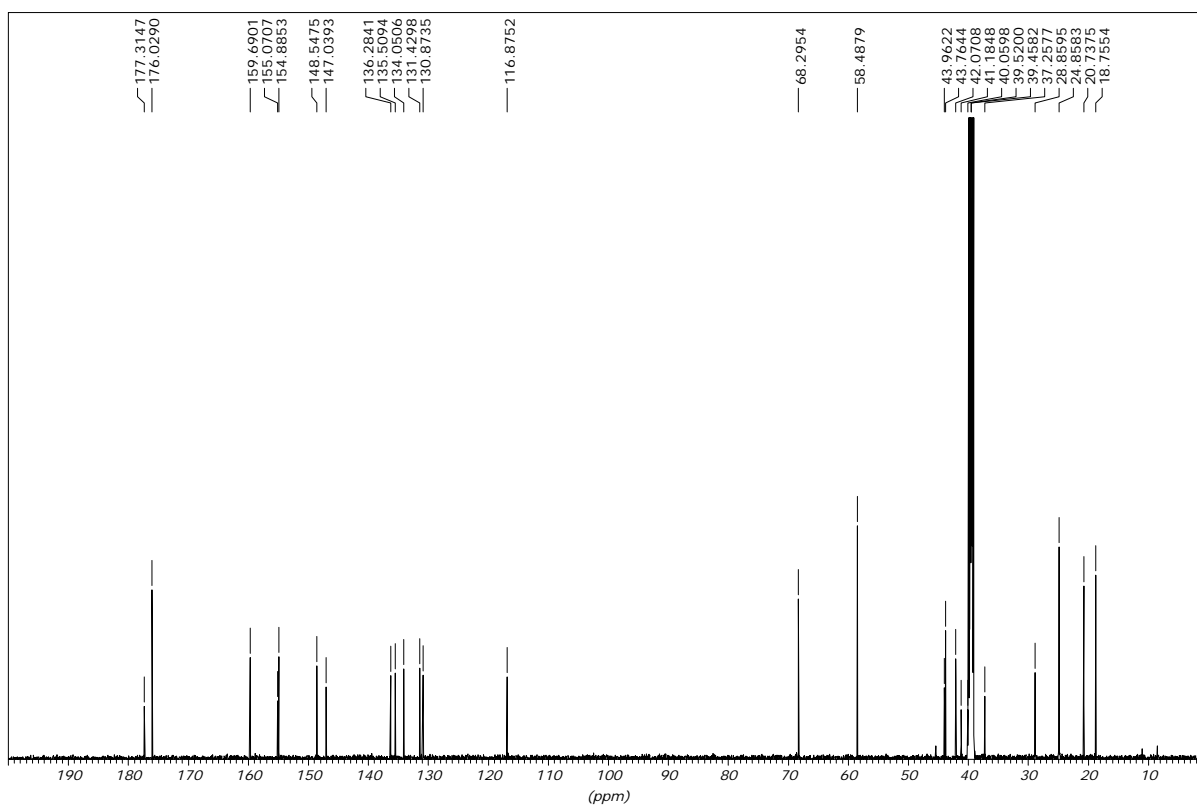

Supplement: Additional file 1 [file 1860-5397-5-26-S1.pdf]
